# Supplementary material
Source: Royal Society of Chemistry journal article supplement (doi:10.1039/d6ta01792d)
Supplement: d6ta01792d1.pdf [file d6ta01792d1.pdf]

## Supporting Information

### **Dual-Active Ca - Li Alloy Anodes Enable Ultra-Stable and Ultra-Low-Cost Liquid Metal Batteries**

*Lei Huang, Yan Zhou, Han Zhou, Xiaohui Ning\**

Center for Alloy Innovation and Design (CAID), State Key Laboratory for  
Mechanical Behavior of Materials, Xi'an Jiaotong University, Xi'an, Shaanxi 710049,  
P. R. China

E-mail: [xiaohuining@mail.xjtu.edu.cn](mailto:xiaohuining@mail.xjtu.edu.cn)

## Supporting Figures

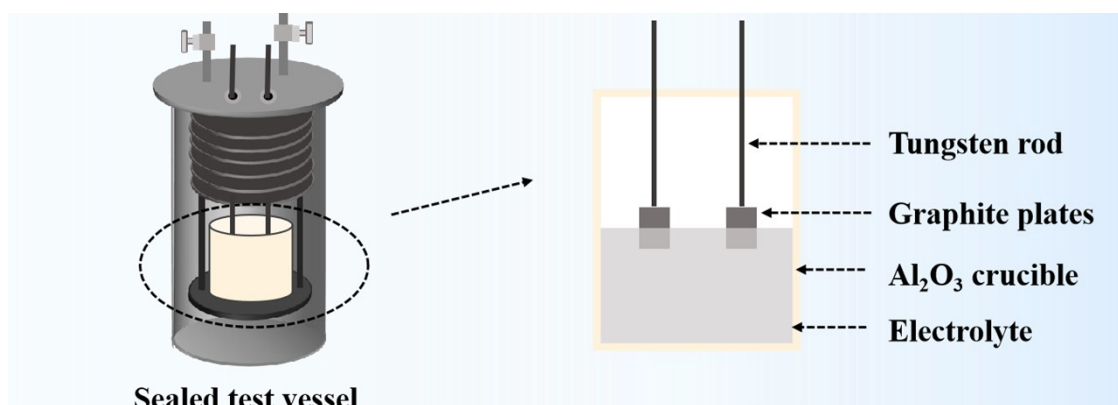

Figure S1. Schematic diagram of pre-electrolysis device.

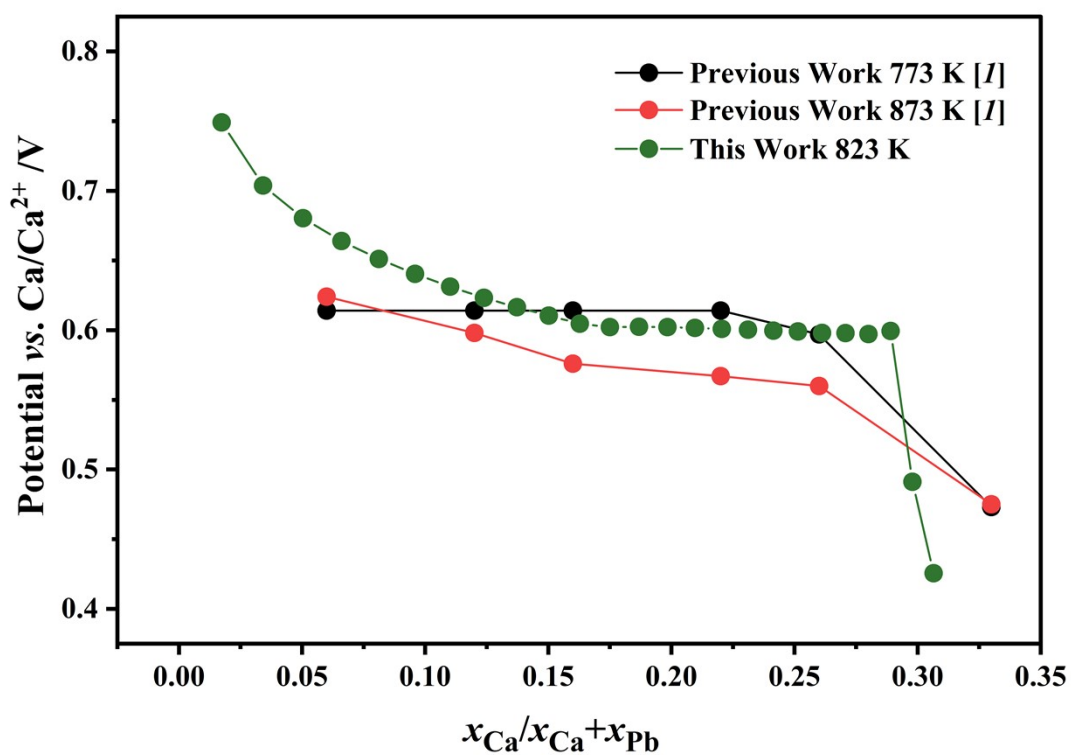

Figure S2. Equilibrium cell voltage values of the WE and comparison with previously reported values<sup>8</sup> as a function of composition of the Ca-Pb electrode at 550°C.

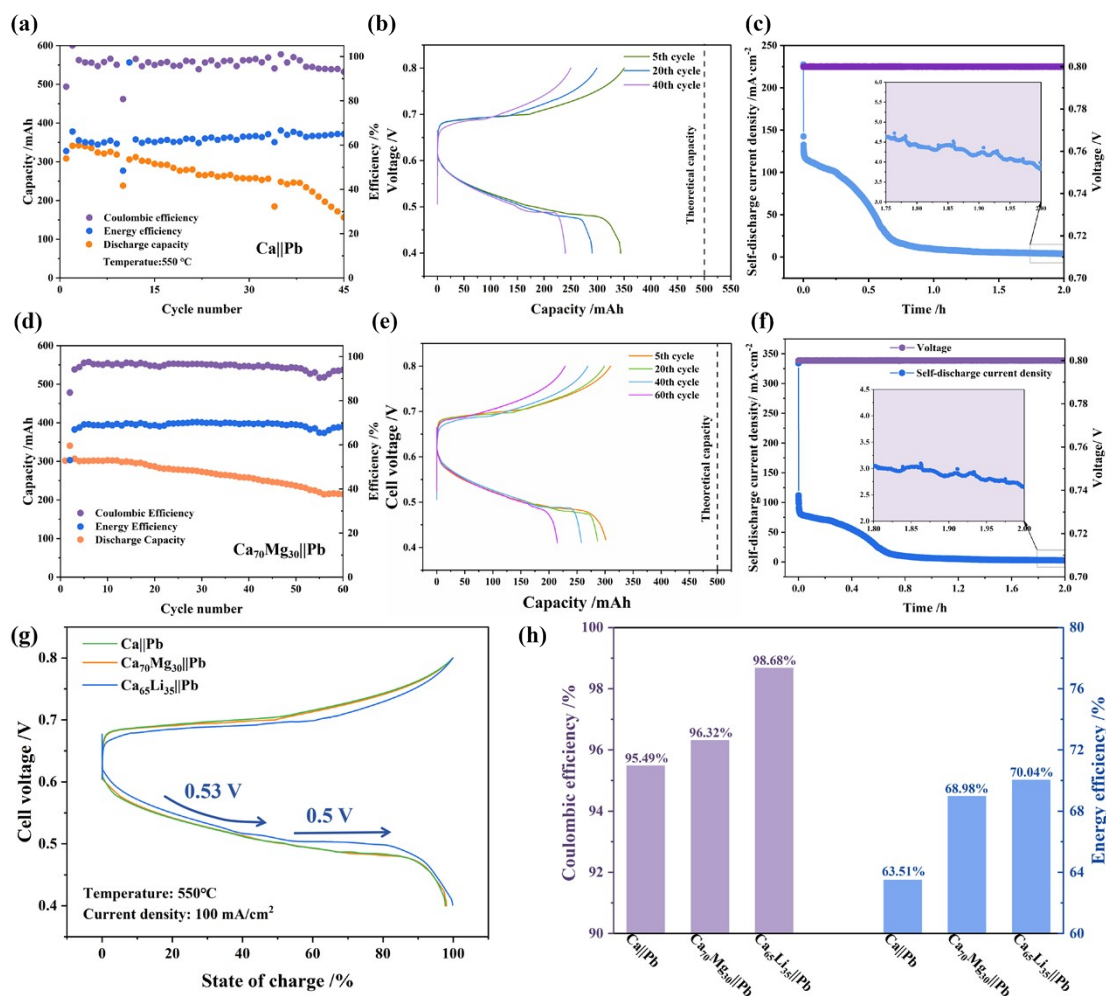

**Figure S3.** Electrochemical performance of control group. (a) The cycling performance of the Ca||Pb cell at 100 mA/cm<sup>2</sup> under 550°C. (b) The charge-discharge voltage profiles at the 5<sup>th</sup>, 20<sup>th</sup>, and 40<sup>th</sup> cycle. (c) Self-discharge curve at the fully charged state of the 5<sup>th</sup> cycle. (d) The cycling performance of the Ca<sub>70</sub>Mg<sub>30</sub>||Pb cell at 100 mA/cm<sup>2</sup> under 550°C. (e) The charge-discharge voltage profiles at the 5<sup>th</sup>, 20<sup>th</sup>, 40<sup>th</sup>, and 60<sup>th</sup> cycle. (f) Self-discharge curve at the fully charged state of the 5<sup>th</sup> cycle. (g) The charge-discharge voltage profiles and (h) the efficiency comparison of the Ca||Pb, Ca<sub>70</sub>Mg<sub>30</sub>||Pb, and Ca<sub>65</sub>Li<sub>35</sub>||Pb cell.

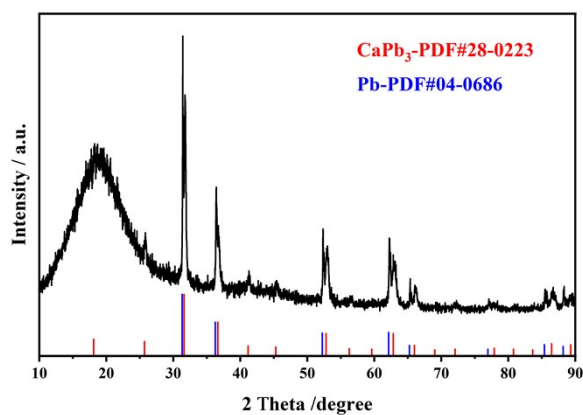

**Figure S4.** The X-ray diffraction pattern of the cathode at 100% DOD in the  $\text{Ca}_{70}\text{Mg}_{30}\|\text{Pb}$  cell.

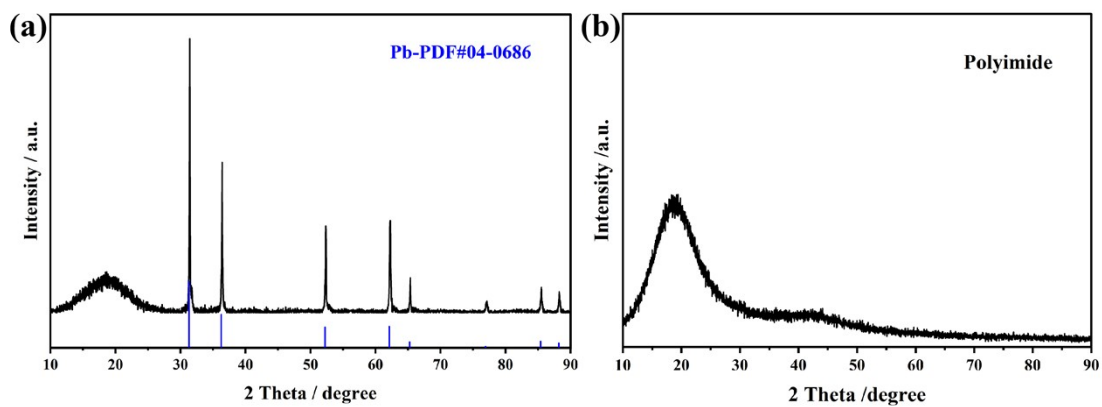

**Figure S5.** The X-ray diffraction pattern of (a) the Pb cathode at the initial state and (b) the PI type.

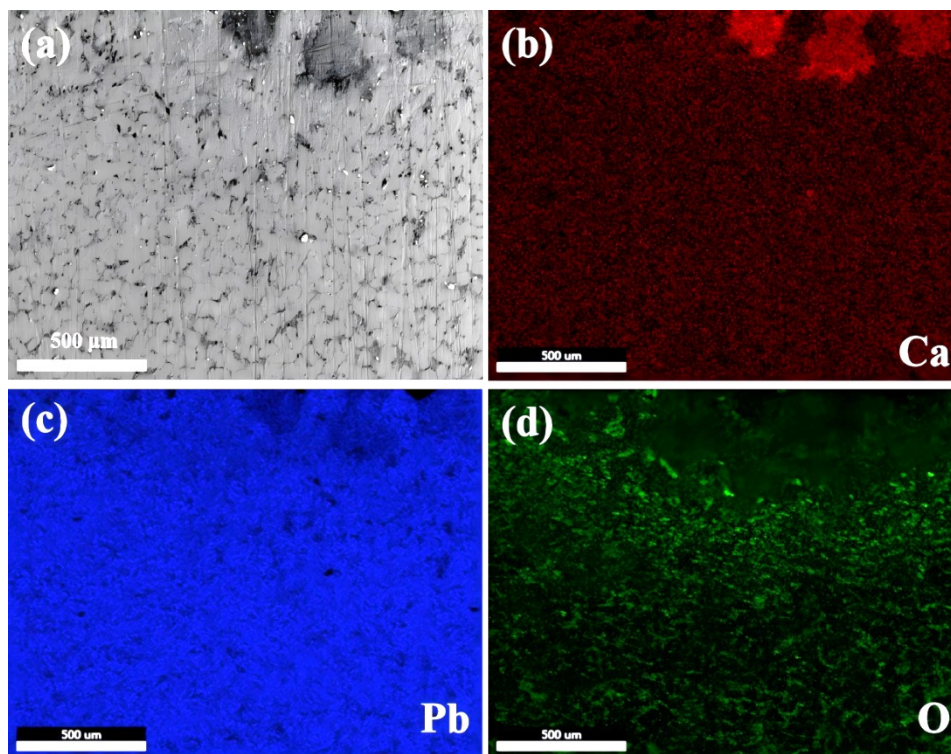

**Figure S6.** Energy-dispersive X-ray spectroscopy (EDS) analysis of the cathode at 100% DOD in the  $\text{Ca}_{65}\text{Li}_{35}\|\text{Pb}$  cell.

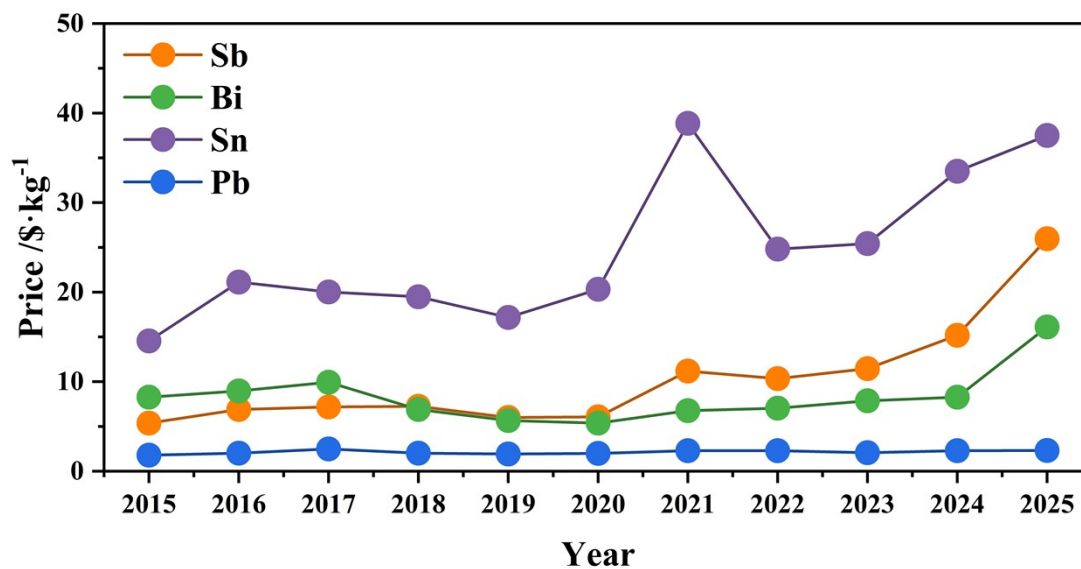

**Figure S7.** The price variation of major cathode candidates over the past decade. (Data sourced from mainstream commodity trading website [www.asianmetal.cn](http://www.asianmetal.cn) for August 2025.)

## Supporting Tables

**Table S1** The Electronegativity, equilibrium potential versus  $\text{Ca}^{2+}/\text{Ca}$ , melting point, electrical conductivity, and cost of Sb, Bi, Sn and Pb.

| Element | Electronegativity | Equilibrium potential /V  | Melting point /°C | Electrical conductivity×10 <sup>6</sup> /S m <sup>-1</sup> | Cost <sup>(a)</sup> /\$ kg <sup>-1</sup> |
|---------|-------------------|---------------------------|-------------------|------------------------------------------------------------|------------------------------------------|
| Sb      | 2.05              | 0.94-1.04 <sup>2</sup>    | 631 <sup>3</sup>  | 2.56                                                       | 25.97                                    |
| Bi      | 2.02              | 0.79-0.90 <sup>2, 4</sup> | 271 <sup>3</sup>  | 0.93                                                       | 16.11                                    |
| Sn      | 1.96              | 0.51-0.77 <sup>2</sup>    | 232 <sup>3</sup>  | 8.69                                                       | 37.5                                     |
| Pb      | 2.33              | 0.50-0.69 <sup>2</sup>    | 327 <sup>3</sup>  | 5.21                                                       | 2.32                                     |

(a) Data sourced from mainstream commodity trading website [www.asianmetal.cn](http://www.asianmetal.cn) for August 2025.

**Table S2** Mass loading of materials involved in the cells.

| Cell                                   | Achieved discharge capacity /Ah | Mass/g |        |        |         |                         |
|----------------------------------------|---------------------------------|--------|--------|--------|---------|-------------------------|
|                                        |                                 | Ca     | Mg     | Li     | Pb      | CaCl <sub>2</sub> -LiCl |
| Ca <sub>70</sub> Mg <sub>30</sub>   Pb | 0.35                            | 0.3739 | 0.0971 | 0      | 5.8088  | 20                      |
| Ca <sub>65</sub> Li <sub>35</sub>   Pb | 0.13                            | 0.1066 | 0      | 0.0100 | 2.0069  | 20                      |
| Ca <sub>65</sub> Li <sub>35</sub>   Pb | 4.08                            | 3.3805 | 0      | 0.3195 | 47.3201 | 185                     |
| Ca  Pb                                 | 0.35                            | 0.3738 | 0      | 0      | 5.7983  | 20                      |

**Table S3** Summary of metal prices for the anode and cathode. (Data sourced from

mainstream commodity trading website [www.asianmetal.cn](http://www.asianmetal.cn) for August 2025.)

| <b>Element</b>                   | <b>Ca</b> | <b>Li</b> | <b>Mg</b> | <b>Sb</b> | <b>Bi</b> | <b>Sn</b> | <b>Pb</b> |
|----------------------------------|-----------|-----------|-----------|-----------|-----------|-----------|-----------|
| <b>Price/ \$ kg<sup>-1</sup></b> | 9.03      | 86.11     | 2.53      | 25.97     | 16.11     | 37.5      | 2.32      |

## References

- 1 N. D. Smith, N. E. Orabona, J. P. Soldan Palma, Y. Kong, C. Blanchard and H. Kim, *Journal of Power Sources*, 2020, 451.
- 2 J. Delcet, A. Brune and J. J. Egan, *Journal of Metals*, 1979, 31, F37-F37.
- 3 H. Kim, D.A. Boysen, J.M. Newhouse, B.L. Spatocco, B. Chung, P.J. Burke, D.J. Bradwell, K. Jiang, A.A. Tomaszowska, K. Wang, W. Wei, L.A. Ortiz, S.A. Barriga, S.M. Poizeau, D.R. Sadoway, *Liquid Metal Batteries: Past, Present, and Future*, *Chemical Reviews* 113(3) (2013) 2075-2099. <https://doi.org/10.1021/cr300205k>.
- 4 J. J. Egan, *Journal of Nuclear Materials*, 1974, 51, 30-35.
